# Supplementary material
Source: publisher figshare collection journal article supplement (https://gsajournals.figshare.com/ndownloader/files/13021517)
Supplement: Supplementary file 1 [file 13021517]

Primers used to amplify the *CAN1* region.

The primers have the miseq adapter overhangs

Forward overhang: TCGTCGGCAGCGTCAGATGTGTATAAGAGACAG

Reverse overhang: GTCTCGTGGGCTCGGAGATGTGTATAAGAGACAG

| Primer name | Sequence |
| --- | --- |
| *CAN1*-1F | TCGTCGGCAGCGTCAGATGTGTATAAGAGACAG AGACGCCGACATAGAGGAGA |
| *CAN1*-1R | GTCTCGTGGGCTCGGAGATGTGTATAAGAGACAG ACCAAGGGCAATCATACCAA |
| *CAN1*-2F | TCGTCGGCAGCGTCAGATGTGTATAAGAGACAG TTGGTATGATTGCCCTTGGT |
| *CAN1*-2F | GTCTCGTGGGCTCGGAGATGTGTATAAGAGACAG AAGTTCCAGGGCAAAAGTGA |
| *CAN1*-3F | TCGTCGGCAGCGTCAGATGTGTATAAGAGACAG TCACTTTTGCCCTGGAACTT |
| *CAN1*-3R | GTCTCGTGGGCTCGGAGATGTGTATAAGAGACAG GCACCTGGGTTTCTCCAATA |
| *CAN1*-4F | TCGTCGGCAGCGTCAGATGTGTATAAGAGACAG GTTTGTGGTGCTGGGGTTAC |
| *CAN1*-4F | GTCTCGTGGGCTCGGAGATGTGTATAAGAGACAG TCTTGGAACGGATTTTCTGG |
| *CAN1*-5F | TCGTCGGCAGCGTCAGATGTGTATAAGAGACAG TAACGCTGCCTTCACATTTC |
| *CAN1*-5R | GTCTCGTGGGCTCGGAGATGTGTATAAGAGACAG GCGGCAGAAATAATGGTTGT |
| *CAN1*-6F | TCGTCGGCAGCGTCAGATGTGTATAAGAGACAG ATTTCTGCCGCAAATTCAAA |
| *CAN1*-6F | GTCTCGTGGGCTCGGAGATGTGTATAAGAGACAG ATGCCACGGTATTTCAAAGC |
| *CAN1*-7F | TCGTCGGCAGCGTCAGATGTGTATAAGAGACAG AAATACCGTGGCATCTCTCG |
| *CAN1*-7R | GTCTCGTGGGCTCGGAGATGTGTATAAGAGACAG TTCCCATACAATTGCCTCAA |
| *CAN1*-8F | TCGTCGGCAGCGTCAGATGTGTATAAGAGACAG TTTGCACCAAAATTCAATGG |
| *CAN1*-8F | GTCTCGTGGGCTCGGAGATGTGTATAAGAGACAG TGAGGGTGAGAATGCGAAAT |
